# Multi-omic surveillance of *Escherichia coli* and *Klebsiella* spp. in hospital sink drains and patients

Constantinides B,<sup>a,b,c,†,\*</sup> Chau KK,<sup>a,b,c,†</sup> Quan TP,<sup>a,b,c</sup> Rodger G,<sup>a,b,c</sup> Andersson M,<sup>d</sup> Jeffery K,<sup>d</sup> Lipworth S,<sup>a</sup> Gweon HS,<sup>e</sup> Peniket A,<sup>f</sup> Pike G,<sup>g</sup> Millo J,<sup>h</sup> Byukusenge M,<sup>i</sup> Holdaway M,<sup>h</sup> Gibbons C,<sup>g</sup> Mathers AJ,<sup>i,j</sup> Crook DW,<sup>a,b,c,d</sup> Peto TEA,<sup>a,b,c,d</sup> Walker AS,<sup>a,b,c</sup> Stoesser N<sup>a,b,c,d</sup>

<sup>a</sup> Nuffield Department of Medicine, University of Oxford, Oxford, UK <sup>b</sup> National Institute for Health Research (NIHR) Health Protection Research Unit on Healthcare Associated Infections and Antimicrobial Resistance, John Radcliffe Hospital, Oxford, UK <sup>c</sup> NIHR Biomedical Research Centre, Oxford, UK <sup>d</sup> Department of Infectious diseases/Microbiology, Oxford University Hospitals NHS Foundation Trust, Oxford, UK <sup>e</sup> Harborne Building, School of Biological Sciences, University of Reading, Reading, UK <sup>f</sup> Department of Haematology, Oxford University Hospitals NHS Foundation Trust, Oxford, UK <sup>g</sup> Department of Medicine, Oxford University Hospitals NHS Foundation Trust, Oxford, UK <sup>h</sup> Adult Intensive Care Unit, Oxford University Hospitals NHS Foundation Trust, Oxford, UK <sup>i</sup> Clinical Microbiology, Department of Pathology, University of Virginia Health System, Charlottesville, Virginia, USA <sup>j</sup> Division of Infectious Diseases and International Health, Department of Medicine, University of Virginia Health System, Charlottesville, Virginia, USA <sup>†</sup>

Compiled February 19, 2020

This is a draft manuscript, pre-submission

Address correspondence to Bede Constantinides ([bede.constantinides@ndm.ox.ac.uk](mailto:bede.constantinides@ndm.ox.ac.uk)) or alternatively to Nicole Stoesser ([nicole.stoesser@ndm.ox.ac.uk](mailto:nicole.stoesser@ndm.ox.ac.uk)).

† BC and KKC contributed equally to this work.

**ABSTRACT** *Escherichia coli* and *Klebsiella* spp. are important human pathogens that cause a wide spectrum of clinical disease. In healthcare settings, sinks and other wastewater sites have been shown to be reservoirs of antimicrobial-resistant *E. coli* and *Klebsiella* spp., particularly in the context of outbreaks of resistant strains amongst patients. Without focusing exclusively on resistance markers or a clinical outbreak, we demonstrate that many hospital sink drains are abundantly and persistently colonised with diverse populations of *E. coli*, *Klebsiella pneumoniae* and *Klebsiella oxytoca*, including both antimicrobial-resistant and susceptible strains. Using whole genome sequencing (WGS) of 439 isolates, we show that environmental bacterial populations are largely structured by ward and sink, with only a handful of lineages, such as *E. coli* ST635, being widely distributed, suggesting different prevailing ecologies which may vary as a result of different inputs and selection pressures. WGS of 46 contemporaneous patient isolates identified one (2%; 95% CI 0.05-11%) *E. coli* urine infection-associated isolate with high similarity to a prior sink isolate, suggesting that sinks may contribute to up to 10% of infections caused by these organisms in patients on the ward over the same timeframe. Using metagenomics from 20 sink-timepoints, we show that sinks also harbour many clinically relevant antimicrobial resistance genes including *bla*<sub>CTX-M</sub>, *bla*<sub>SHV</sub> and *mcr*, and may act as niches for the exchange and amplification of these genes. Our study reinforces the potential role of sinks in contributing to Enterobacterales infection and antimicrobial resistance in hospital patients, something that could be amenable to intervention.

**IMPORTANCE** *Escherichia coli* and *Klebsiella* spp. cause a wide range of bacterial infections, including bloodstream, urine and lung infections. Previous studies have shown that sink drains in hospitals may be part of transmission chains in outbreaks of antimicrobial-resistant *E. coli* and *Klebsiella* spp., leading to colonisation and clinical disease in patients. We show that even in non-outbreak settings, contamination of sink drains by these bacteria is common across hospital wards, and that many antimicrobial resistance genes can be found and potentially exchanged in these sink drain sites.

Constantinides et al.

46 Our findings demonstrate that the colonisation of handwashing sink drains by these  
47 bacteria in hospitals is likely contributing to some infections in patients, and that  
48 additional work is needed to further quantify this risk, and to consider appropriate  
49 mitigating interventions.

50 **KEYWORDS:** enterobacterales, antimicrobial resistance, wastewater, resistome

## 51 INTRODUCTION

52 Infections caused by Enterobacterales, including *Escherichia coli* and *Klebsiella* spp.,  
53 are major causes of global morbidity, and particular antimicrobial-resistant strains  
54 (namely extended-spectrum beta-lactamase and carbapenemase producers) have been  
55 listed as critical priority pathogens for mitigation by the WHO. In the UK, year-on-year  
56 increases have been observed in the number of *E. coli* and *Klebsiella* spp. bloodstream  
57 infections (1), for reasons which remain unclear. As well as causing invasive disease,  
58 these organisms are capable of colonising a wide range of animal and environmental  
59 niches, and are frequently carried in the human gastrointestinal tract (2). As such, they  
60 are also commonly found in human wastewater, and in wastewater-associated sites  
61 such as sewers and water treatment infrastructure (3).

62 A significant proportion of Enterobacterales infections are healthcare-associated,  
63 prompting the UK government to introduce a target in 2016 to halve the number of  
64 healthcare-associated Gram-negative bloodstream infections by 2021 (4). Wastewater  
65 sites in hospitals have been highlighted as reservoirs of drug-resistant Enterobacterales,  
66 with several studies reporting that ongoing transmission and outbreaks of human dis-  
67 ease are associated with the contamination of, for example, sinks, by these organisms  
68 (5, 6). More recently, several studies have shown reductions in colonisation and/or  
69 invasive infection with Enterobacterales and other Gram-negative bacilli following the  
70 introduction of strategies to remove sinks and mitigate possible contamination from  
71 wastewater sources in patient rooms (7, 8). Most of these studies however focus on  
72 the sampling and control of antimicrobial-resistant strains, often representing a more  
73 immediate clinical problem in an outbreak setting, rather than on the possibility that  
74 these sites may represent part of the wider endemic transmission network of both  
75 susceptible and resistant strains causing infection in patients.

76 Whole genome sequencing of bacterial isolates is increasingly used as the most  
77 robust, high-resolution approach to characterising relatedness between strains, and  
78 hence determining likely transmission (9). However, the diversity of complex, polymicro-  
79 bial environmental reservoirs is incompletely captured by sequencing small numbers  
80 of isolates, and this breadth of diversity can be more fully captured by using a metage-  
81 nomic approach, which characterises the genetic complement of a whole sample (10).  
82 Combining both approaches has been shown to improve our understanding of species  
83 and antimicrobial resistance (AMR) gene diversity within environmental, wastewater  
84 and river samples (11, 12) and of transmission in a sink-associated outbreak of *Sphin-*  
85 *gomonas koreensis* (also a Gram-negative bacillus) in the NIH Clinical Centre in the US  
86 (13).

87 In order to investigate the prevalence of contamination of healthcare sinks by  
88 strains of *E. coli* and *Klebsiella* spp., including those resistant to third-generation  
89 cephalosporins and carbapenems, we sampled all sink sites using p-trap (U-bend)  
90 aspirates across several wards and timepoints in a single UK hospital in 2017. We  
91 used a combination of whole genome sequencing of cultured isolates from all sink  
92 samples and metagenomic sequencing of a subset of sink samples to facilitate a high-

Multi-omic surveillance of *Escherichia coli* and *Klebsiella* spp. in hospital sink drains and patients

93 resolution assessment of the genetic diversity present in these niches. To determine  
94 whether sinks were a reservoir of Enterobacterales strains causing infection in patients  
95 over similar timeframes, we simultaneously retrieved relevant isolates from culture-  
96 positive specimens taken from patients admitted to the same ward locations, and used  
97 genomics to identify the degree of genetic relatedness.

## 98 RESULTS

99 **Diverse, often antimicrobial-resistant Enterobacterales strains are frequent—and**  
100 **often persistent—colonisers of hospital sink drains.** 439 Enterobacterales isolates  
101 comprising *E. coli* (n=180), *K. oxytoca* (n=166) and *K. pneumoniae* (n=93) were cultured  
102 and successfully sequenced at one or more timepoints from 12/20 (60%), 9/23 (43%)  
103 and 16/23 (70%) sinks sampled four times over 12 weeks (March-May 2017) in general  
104 medicine (GM), adult critical care (ACC) and acute admissions (AA) wards respectively  
105 (97/264 [37%] sink-timepoints culture-positive overall; Figure 1). A further 30 isolates  
106 of *E. coli* (n=13), *K. oxytoca* (n=13) and *K. pneumoniae* (n=4) were cultured from 11/59  
107 (19%) sinks in a haematology ward, sampled at a single timepoint only during this  
108 period (Figure S1). See Table S1 for surveyed sink descriptions. Species distributions  
109 (by culture) were relatively even across the general medicine ward, while the adult  
110 critical care unit was enriched for *E. coli*, and the acute admissions ward was depleted  
111 in *K. pneumoniae* (Table S2).

112 Analysis of whole genome sequences from cultured Enterobacterales revealed  
113 widespread and sustained colonisation of sinks by multiple sequence types (STs) of  
114 these species (Figure 1, Figure S1) In total, 8 known and 4 novel *E. coli* STs were repre-  
115 sented, of which STs 635 (n=109, 61%), 401 (n=25, 14%) and 472 (n=18, 10%) accounted  
116 for 84% of sequenced isolates (152/180). *Klebsiella* spp. STs were more varied: 15  
117 known and 6 novel *K. oxytoca* STs were represented, of which the most frequent was  
118 ST177 (33/166, 20%), while there were 18 known and 1 novel *K. pneumoniae* STs, the  
119 most frequent being ST872 (24/93, 26%).

120 Across all locations and sink-timepoints, sequenced isolates comprised 20, 50 and  
121 26 distinct strains (defined as differing by  $\leq 100$  recombination-adjusted core SNPs;  
122 see Materials and Methods) of *E. coli*, *K. oxytoca* and *K. pneumoniae* respectively (Figure  
123 1, Table 1). Positive sinks cultured up to three of these distinct strains per species  
124 at any timepoint (Figure 1, Figure S1), reflecting significant diversity within species  
125 in sink niches. Of the 37 longitudinally sampled culture-positive sinks from which  
126 sequences were obtained, 31 (84%) grew isolates belonging to the same strain across  
127 multiple timepoints, highlighting persistent background colonisation illustrated for  
128 *E. coli* and *Klebsiella* spp. in respective figures 1 and S5. Isolates resistant to third-  
129 generation cephalosporins were cultured at 16 sink-timepoints across 12 distinct sinks,  
130 with resistant and susceptible cultures of the same genetic strain co-occurring in 11/16  
131 (69%) sink-timepoints, suggestive of gain and/or loss of genes conferring cephalosporin  
132 resistance in this setting. No carbapenem-resistant isolates were cultured.

133 **Enterobacterales can be highly abundant in sink drains, representing domi-**  
134 **nant populations in some wards.** Deep metagenomic Illumina sequencing was per-  
135 formed for 20 sink-timepoints on p-trap aspirates from seven sinks on the three wards  
136 at two timepoints, and all four timepoints for a single sink unit in the adult critical  
137 care ward (median 3.6m reads/sample; IQR: 3.3m-7.2m). The three most abundant  
138 bacterial genera were *Klebsiella*, *Escherichia* and *Citrobacter*, all common healthcare-  
139 associated pathogens (Figure 2). Sink drains in the general medicine ward were the  
140 most abundantly colonised by Enterobacterales (Figure 2), to which more than 50%  
141 of reads were assigned, and were markedly less diverse than those in adult critical

Constantinides et al.

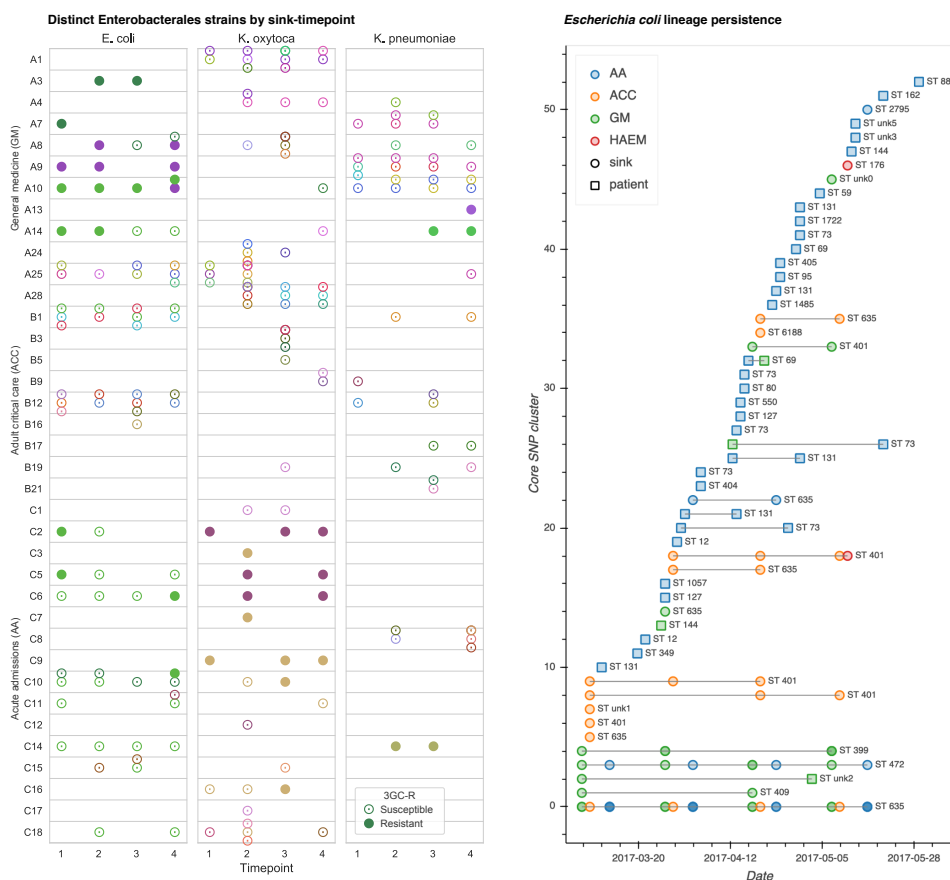

**FIG 1 Cluster distribution and persistence. Left: strain-distinct cultured isolates of *E. coli*, *K. oxytoca* and *K. pneumoniae* from sink drain aspirates sampled over twelve weeks across three hospital wards. Different colours indicate distinct strains (defined by 100 SNP clusters), and cefpodoxime-resistant and/or selected ESBL-positive isolates are indicated by filled markers. Right: persistence of sink and contemporaneous patient *E. coli* strains throughout the sampling period.**

|                                    | <i>E.coli</i> | <i>K.oxytoca</i> | <i>K.pneumoniae</i> | Total lineages |
|------------------------------------|---------------|------------------|---------------------|----------------|
| <b>Lineages with 1 isolate</b>     |               |                  |                     |                |
| Patient                            | 28            | 1                | 3                   | 32             |
| Sink                               | 3             | 37               | 12                  | 52             |
| <b>Lineages with &gt;1 isolate</b> |               |                  |                     |                |
| Same sink: same timepoint          | 5             | 6                | 3                   | 14             |
| Same sink: different timepoints    | 7             | 1                | 7                   | 15             |
| Same ward: different sinks         | 1             | 5                | 4                   | 10             |
| Different wards                    | 3             | 1                | 0                   | 4              |
| Patient and sink*                  | 1             | 0                | 0                   | 1              |
| Same patient                       | 1             | 0                | 1                   | 2              |
| Different patients                 | 4             | 0                | 0                   | 4              |
| <b>TOTAL</b>                       | <b>53</b>     | <b>51</b>        | <b>30</b>           | <b>134</b>     |

\*lineage has 3 isolates: All taken from the same ward: 2 from the same sink at the same timepoint and 1 from a patient 2 months later

**TABLE 1** Spatiotemporal distribution of 100 core SNP lineages of cultured *E. coli* (n=53), *K. oxytoca* (n=51) and *K. pneumoniae* (n=30) cultures.



Multi-omic surveillance of *Escherichia coli* and *Klebsiella* spp. in hospital sink drains and patients

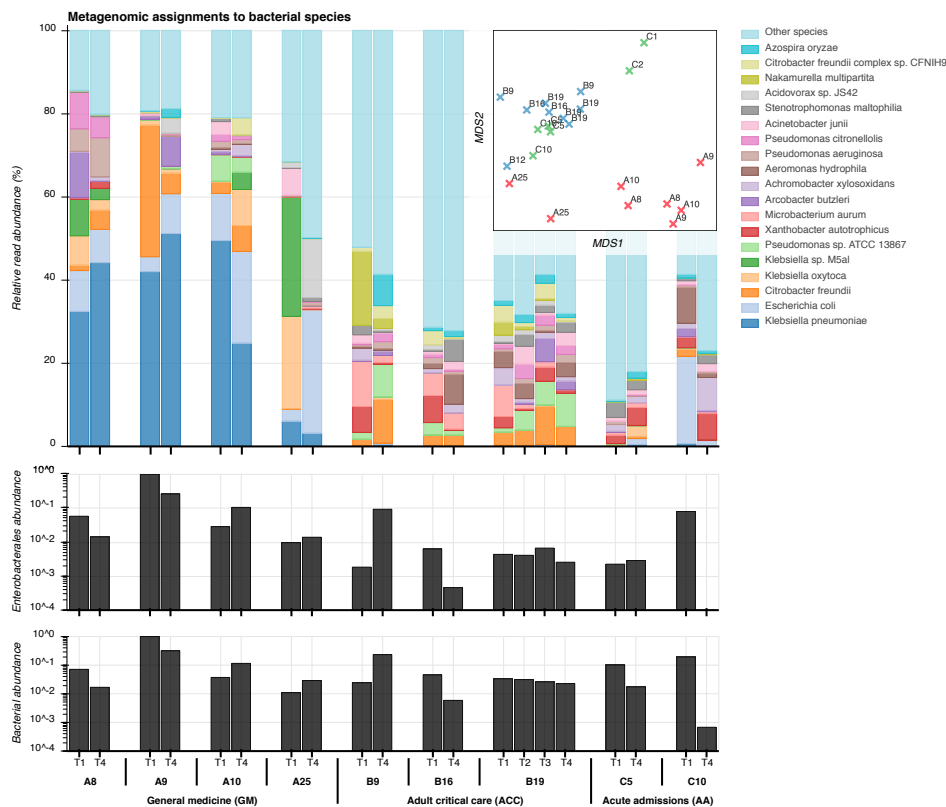

**FIG 2 Taxonomic composition of sink microbiota from metagenomic sequencing. Top: relative abundance of the 20 most abundant bacterial species among sink drain aspirates (Kraken), inset with a corresponding multidimensional scaling (MDS) projection of pairwise distances between samples. Centre: spike-normalised relative abundance of species classifications at or below the order Enterobacteriales among sink-timepoints. Bottom: spike-normalised relative abundance of Kraken classifications at or below the superkingdom Bacteria.**

142 care and acute admissions wards, which had a dominance of *Klebsiella* spp., mirroring  
 143 the culture results. 90% of species-level classifications in the sink-timepoints from the  
 144 general medicine ward came from a median of just 21 bacterial species, compared with  
 145 medians of 310 and 450 species in the adult critical care and acute admissions wards  
 146 respectively. Microbial composition varied markedly between sampling timepoints for  
 147 individual sinks, but sinks within wards exhibited more similar taxonomic profiles than  
 148 those between wards (Figure 2), suggesting distinct ward-based wastewater ecologies.  
 149 Total metagenomic sequence content was hierarchically structured by ward and by  
 150 sink (Figure S2). Staff room sink A25 exhibited distinctive taxonomic and *k*-mer profiles  
 151 from patient room sinks in the general medicine ward (Figure 2, Figure S2).

152 Sinks with high metagenomic abundance of the three Enterobacteriales species  
 153 reliably yielded corresponding cultures. The area beneath the receiver operating char-  
 154 acteristic (ROC) curve for culture-based detection of these species was 0.93 (Figure S3).  
 155 When the relative metagenomic abundance of a species was above 0.1%, 1% and 10%,  
 156 one or more cultures of the same organism were obtained in 58% (18/31), 76% (16/21)  
 157 and 89% (8/9) of sinks respectively. Conversely, culture detection therefore failed in  
 158 42% (13/31), 24% (5/21) and 11% (1/9) of cases where an Enterobacteriales species  
 159 was present at or above respective thresholds of 0.1%, 1% and 10% metagenomic  
 160 abundance. A single sink-timepoint (first sample from A8; general medicine) failed

Constantinides et al.

161 to culture any Enterobacterales, but yielded 4%, 5% and 16% relative metagenomic  
162 abundances for the three study species. Thus metagenomic sequencing suggests that  
163 persistence may be even more widespread than indicated by culture alone.

164 **Most environmental Enterobacterales appear to cluster within specific sinks**  
165 **and wards, except for *E. coli* ST635, which is widely distributed.** The 96 strains  
166 found in sinks exhibited structure at the ward and sink level. Three strains were found  
167 in multiple wards (*E. coli* STs 472 and 635; *K. oxytoca* ST 146). 93 (97%) strains were  
168 only ever found in a single ward, and of the 39 strains cultured twice or more, only 11  
169 (28%) were cultured from different sinks (Table 1). Further, of the 35 strains cultured  
170 twice or more on wards which were repeatedly sampled (i.e. where it was theoretically  
171 possible for the strain to be observed at different timepoints), 12 (34%) were only seen  
172 at the same sink-timepoint, 13 (37%) were seen in the same sink at different timepoints,  
173 and 10 (29%) in different sinks at different timepoints. This structure was reflected in  
174 the recombination-adjusted core genome species phylogenies (Figure 3). The main  
175 exception to ward and sink-based clustering was *E. coli* ST635, which comprised more  
176 than half of isolates sequenced from sinks, and was found in 13/20 (65%) *E. coli*-positive  
177 sinks.

178 However, there was sink-level clustering even within *E. coli* ST635, more clearly  
179 shown in neighbour-joining trees constructed from pairwise read-based MASH dis-  
180 tances, representing both core and accessory genomic content (e.g. *E. coli* ST635 zoom  
181 in Figure 3; colours indicate distinct sinks). Although pairwise correlations between core  
182 and accessory genomic distances were high (Table S3), incorporating accessory content  
183 yielded additional resolution beyond core SNP distances (Figure S4). Permutational  
184 analysis of variance (PERMANOVA) using pairwise core SNP and read-based MASH  
185 distances supported significant grouping of isolates from all three species by ward and  
186 by sink ( $P < 0.001$ ), most conclusively for *K. pneumoniae* (Table S4).

187 **Patient *E. coli* isolates were more diverse than those found in sinks, and**  
188 **included isolates from known 'high-risk' clinical lineages.** From March to May 2017,  
189 1384 relevant clinical samples from 719 patients were submitted to the microbiology  
190 laboratory for processing (AA n=779, ACC n=365, GM n=240), of which 397/1384 (29%)  
191 were positive for microorganisms, and 107 were culture-positive for one of the study  
192 organisms (*E. coli* [n=96], *K. oxytoca* [n=2], *K. pneumoniae* [n=9]). 46/107 (43%) of these  
193 isolates were retrieved for sequencing, including 19/22 isolates from bloodstream  
194 infections, 3/6 from respiratory samples, 21/73 from urine samples, and 0/10 other  
195 samples.

196 Among 39 sequenced *E. coli* patient isolates, 21 STs were represented, including  
197 known high-risk lineages (23/39 (59%) isolates) not seen in sinks: namely ST73 (n=8),  
198 ST131 (n=7), ST69 (n=3), ST12 (n=2), ST127 (n=2), and ST95 (n=1). The single sequenced  
199 *K. oxytoca* isolate was ST36, and the six *K. pneumoniae* isolates came from four STs,  
200 including two high-risk lineages, ST25 and ST29. Across the three species, there were  
201 34, 1 and 4 distinct lineages, respectively (Table 1).

202 **Genetic similarity of sequenced patient and environmental isolates.** As well  
203 as being diverse, the 39 clinical *E. coli* isolates were phylogenetically distinct from most  
204 sink isolates, which largely came from just four sequence types (ST635, ST401, ST472  
205 and ST399). The exception was an *E. coli* isolated from urine taken on the general  
206 medicine ward, which was 17 and 19 core SNPs from two isolates from sink A25 in the  
207 same ward, sampled 58 days prior to the clinical sample (Figure 1; right; cluster 4). A  
208 read-based MASH distance of  $7 \times 10^{-6}$  between this pair of isolates indicated very high  
209 total genomic (chromosome+accessory) similarity. A records search for admissions  
210 of this patient prior to commencing sink sampling revealed four inpatient admissions

Multi-omic surveillance of *Escherichia coli* and *Klebsiella* spp. in hospital sink drains and patients

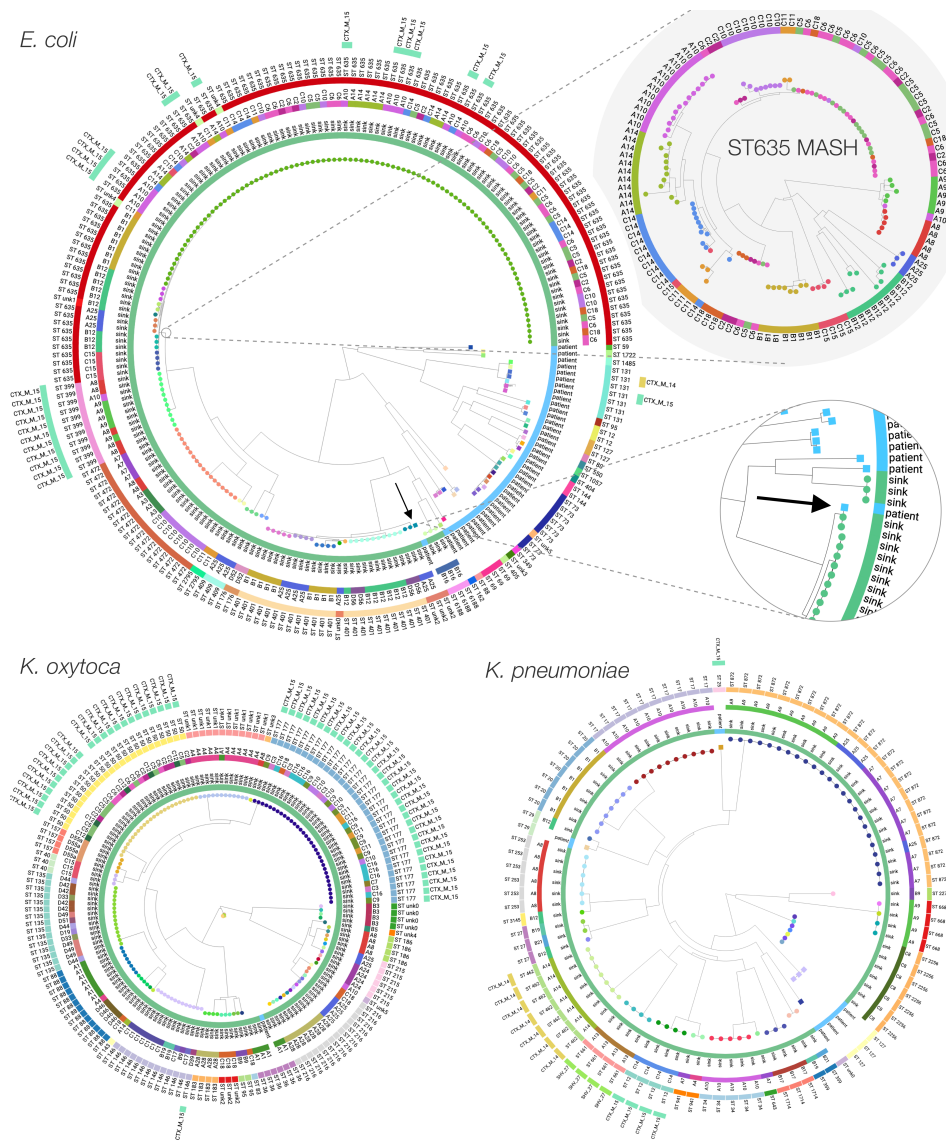

**FIG 3** Maximum likelihood phylogenies of *E. coli*, *K. oxytoca* and *K. pneumoniae* cultured from sink drain aspirates sampled over twelve weeks across three wards, with two zooms corresponding to an *E. coli* ST635 neighbour-joining MASH subtree whose tips are coloured by sink, and genetic overlap between a sink culture and a urine culture from a patient with ward contact during the study. Tip colours indicate strains, with rings inside-to-out denoting: patient/sink, sink designation, sequence type, and ESBL genotype.

Constantinides et al.

211 (of 0 (day case), 1, 2 and 5 nights' duration), of which 3 included time on the acute  
212 admissions ward. There were no prior admissions onto the general medicine ward (in  
213 which their positive urine specimen was taken), although their eleven-night spell on the  
214 general medicine ward commenced with a seven-hour episode in acute admissions.  
215 The positive clinical specimen was taken ten days after the patient's admission onto the  
216 general medicine ward, indicating a large duration of exposure to a ward environment  
217 shown to be harbouring a very similar strain of *E. coli* to the patient's urine culture.  
218 The next most closely related *E. coli* clinical isolate was 3,688 core SNPs from its  
219 nearest sink neighbour (read-based MASH distance 0.009), reflecting the otherwise  
220 large evolutionary distances separating the cultured clinical and environmental *E. coli*  
221 (Figure 3).

222 Unlike *E. coli*, the small numbers of *Klebsiella* spp. patient isolates were not phylo-  
223 genetically segregated from environmental isolates, but the closest patient and sink  
224 isolates differed by 2,558 core SNPs, indicating a lack of observed overlap over these  
225 timeframes.

### 226 **Antimicrobial resistance genes are prevalent and spatially structured in sinks.**

227 The presence of 571 clustered CARD antimicrobial resistance genes in cultured iso-  
228 lates was supported by  $\geq 75\%$  exactly matching read coverage reported by ResPipe  
229 (Figure 4). Among these were known transmissible genes of clinical concern includ-  
230 ing beta lactamases (e.g. *bla*<sub>TEM</sub>, *bla*<sub>CTX-M</sub>, *bla*<sub>SHV</sub>), aminoglycoside resistance genes  
231 (*aac*(3), *aac*(6) families) and quinolone resistance genes (*qnr* family). Some of these,  
232 including *cmlA* and *qacH*, were widely seen in sink metagenomes but less frequently  
233 in cultured isolates, consistent with a background resistance reservoir that may pose  
234 a risk in different populations to those cultured (of either same or different species).  
235 Spatial structure was evident among both cultured isolates and metagenomes, al-  
236 though resistance repertoires of isolates frequently clustered across ward boundaries,  
237 in keeping with findings of our prior core genome analysis. Resistance genes detected  
238 in cultured sink isolates were also abundant within sink metagenomes at one or more  
239 timepoints. Sink drain metagenomes yielded 673 CARD genes exceeding 75% coverage,  
240 and after clustering large gene families represented by many similar sequences (see  
241 methods for detailed description), only five genes abundant in one or more cultured  
242 isolates were not detected in at least one metagenome. Notably, these five genes  
243 (*gadW*, *len-26*, *tet(B)*, *mgrA* and *sat-2*) were all seen in isolates from sinks not subject to  
244 metagenomic sequencing, showing that resistance genes cultured from sink drains  
245 were highly contained in corresponding metagenomes.

246 Third generation cephalosporin-resistant phenotypes in Enterobacterales sink iso-  
247 lates could be explained by the presence of major extended-spectrum beta-lactamase  
248 (ESBL) genes *bla*<sub>SHV-27</sub>, *bla*<sub>CTX-M-14</sub> and *bla*<sub>CTX-M-15</sub>, detected by ARIBA/CARD in 4, 8 and  
249 87 isolates respectively. *bla*<sub>CTX-M-15</sub> was identified in two distinct strains of *E. coli* ST635  
250 and ST399, restricted to three bay sinks (A8, A9, A10) in three adjacent rooms of the  
251 general medicine ward. *bla*<sub>CTX-M-15</sub>-positive *K. oxytoca* ST50 and ST177 were identified in  
252 10 sinks (C2-3, C5-6, C7, C9-12, C16) on the acute admissions ward. *bla*<sub>SHV-27</sub>, *bla*<sub>CTX-M-14</sub>  
253 and *bla*<sub>CTX-M-15</sub> were observed in *K. pneumoniae* from sinks A13, A14 (general medicine)  
254 and C14 (acute admissions) respectively; one *K. pneumoniae* patient isolate was also  
255 *bla*<sub>CTX-M-15</sub>-positive. These findings suggest sink-associated isolates, such as *E. coli*, may  
256 represent reservoirs of clinically relevant resistance genes.

257 Surprisingly, the colistin resistance gene *mcr-4* was detected in the metagenomes—yet  
258 not cultured genomes—of three sinks in adjacent bays of the general medicine ward  
259 (A8-10). Assembly of the sink A10 metagenome generated a 5.4kbp plasmid sequence  
260 containing an *mcr-4* gene with 98.8% overall identity at 94% query coverage to an

Multi-omic surveillance of *Escherichia coli* and *Klebsiella* spp. in hospital sink drains and patients

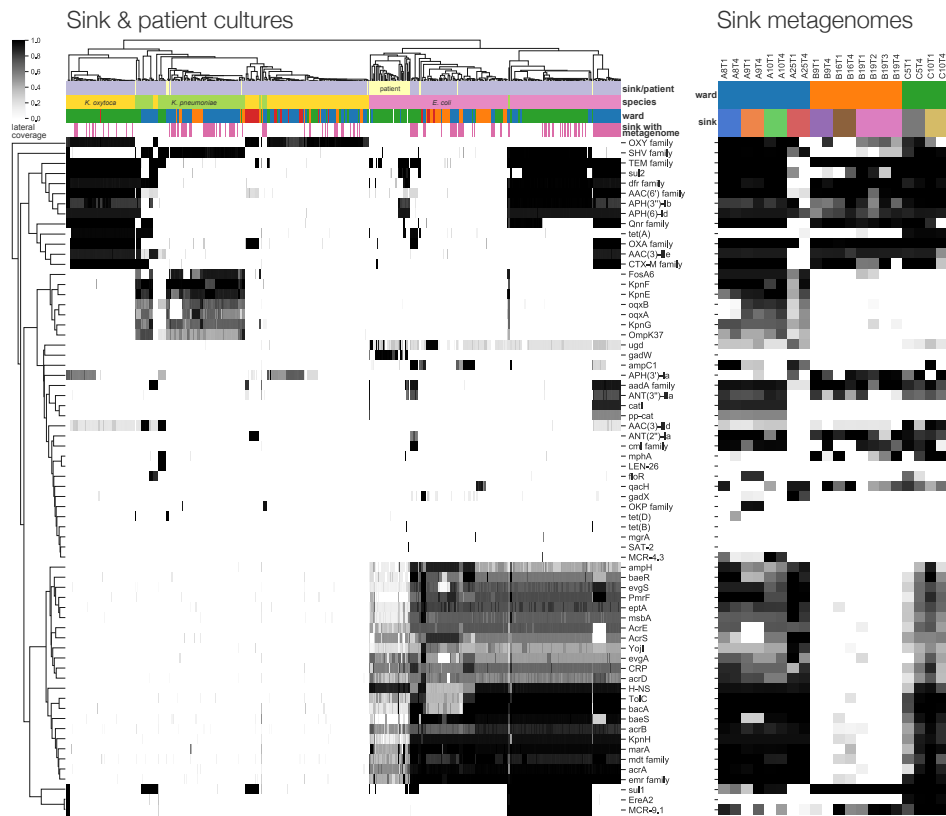

**FIG 4** Antimicrobial resistance gene content of cultured isolates and sink drain metagenomes. Left: lateral coverage of ResPipe/CARD genes within sink drain and clinical isolates. Displayed genes attained  $\geq 75\%$  lateral coverage in one or more isolates. Right: Corresponding lateral coverage of the same genes in sink drain aspirate metagenomes.

Constantinides et al.

261 8.7kbp pMCR-4.2 plasmid previously reported in pigs from Italy, Spain and Belgium (14).  
262 This mcr variant has been previously reported in European Acinetobacter, Enterobacter,  
263 Salmonella, and Escherichia spp. but not to our knowledge in the United Kingdom.  
264 Screening all metagenomes for assembled *mcr-4* produced alignments in two sinks on  
265 the ward (A8, A9) across a total of six sink-timepoints, with coverage and abundance  
266 suggesting low and declining prevalence of this gene over time (Table S5). An mcr posi-  
267 tive *E. coli* (reported as mcr4.3) was cultured from sink C5 (acute admissions; second  
268 timepoint) according to both ARIBA/CARD and ResPipe/CARD. Metagenomic sequenc-  
269 ing was performed for the first and the fourth but not the second timepoint aspirate  
270 for this particular sink. Another mcr gene, *mcr-9* was more widespread, and detected  
271 with complete coverage in 77 cultured isolates across 11 distinct sinks, predominantly  
272 but not exclusively in *E. coli* (73/77 occurrences).

273 **Metagenomic screening suggests that clinical isolates may be more widely**  
274 **present in the environmental reservoir than observed from culture-based com-**  
275 **parisons.** Sink metagenomes were individually screened for *k*-mer containment of *i*)  
276 strain-representative sink isolate genome assemblies, *ii*) strain-representative patient  
277 isolate genome assemblies and *iii*) core genomes of selected control organisms, in-  
278 cluding five clinical core genomes each from pathogenic strains of *E. coli* and *Klebsiella*  
279 spp. from Bush et al. (15), together with NCBI canonical species references for several  
280 pathogens expected to be absent from sink drain microbiota (Figure 5; left). This  
281 demonstrated similar sink, ward, and temporal structure to that of culture, particu-  
282 larly underlying similarities in the microbiota of nearby sinks, as well as flux between  
283 sampling timepoints. Strain-representative sink culture assemblies from the same sink  
284 and timepoint as the screened sink metagenome were the best contained, sharing the  
285 most *k*-mer hashes. Assembled isolates originating from the same sink but at a differ-  
286 ent timepoint to the screened metagenome shared significantly fewer *k*-mer hashes  
287 ( $P=0.013$ ) than same sink/same timepoint comparisons. The containment of strain-  
288 representative assemblies from different sinks in the same ward as the metagenome  
289 was significantly lower still ( $P<0.0001$ ), and so in turn were the remaining comparisons  
290 of cultures grown from different sinks in different wards to the screened metagenome  
291 ( $P<0.0001$ ).

292 Among control genomes, *k*-mer hashes shared between sink metagenomes and  
293 the core genomes of *Neisseria gonorrhoeae*, *Staphylococcus aureus*, *Clostridioides difficile*,  
294 *Enterococcus faecalis* and *Vibrio vulnificus* did not exceed 3%. Reference genomes of *E.*  
295 *coli*, *K. pneumoniae* and *Pseudomonas aeruginosa* were abundant and highly contained  
296 by many metagenomes, but none exceeded 90% shared *k*-mer hashes (Figure 5; right).

297 In contrast, screening for strain-representative patient assemblies in sink metagenomes  
298 revealed significantly greater similarity ( $P<0.0001$ ) between patient and environmen-  
299 tal Enterobacterales strains collected from the same ward than from different wards  
300 (Figure 5; centre), supporting genetic overlap between clinical isolates from patients  
301 and uncultured isolates in sink niches in a given ward setting. Indeed, the only strain-  
302 representative patient isolate with greater than 90% sink metagenome *k*-mer contain-  
303 ment was the *E. coli* urine culture described in the aforementioned case of sink-patient  
304 overlap, of which 99.5% and 93.0% of *k*-mers were contained within the respective  
305 A25T1 and A25T4 sink metagenomes (Figure 5; centre; red markers).

## 306 DISCUSSION

307 In this study, we have demonstrated that hospital sink drains are widely—and in many  
308 cases abundantly—contaminated with key Enterobacterales species causing healthcare-  
309 associated infections, and are potential reservoirs of multiple resistance genes en-



Multi-omic surveillance of *Escherichia coli* and *Klebsiella* spp. in hospital sink drains and patients

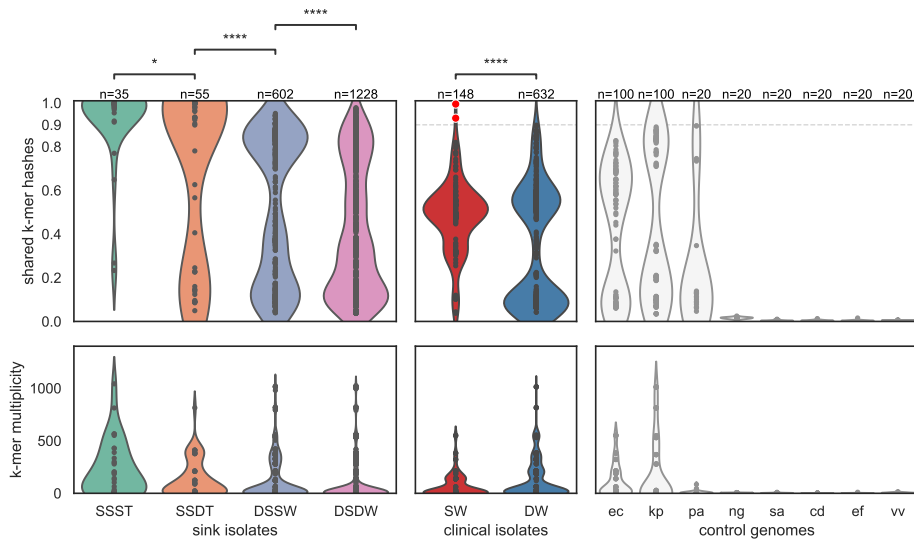

**FIG 5** Metagenomic containment of sink (left) and patient (centre) cultured strain-representative genome assemblies, and control genomes (right). Shared *k*-mer hashes and median *k*-mer multiplicity values are as reported by MASH Screen. SSST=same sink and same timepoint; SSDT=same sink at different timepoints (shared hashes Mann-Whitney U  $P=0.013$  vs. SSST); DSSW=different sinks of the same ward ( $P<0.0001$  vs. SSDT); DSDW=sinks on a different ward ( $P<0.0001$  vs. DSSW). SW=strain-representative assemblies of clinical isolates in the same ward; DW=strain-representative assemblies of clinical isolates from a different ward ( $P<0.0001$  vs. SW). Control genomes comprised *E. coli*, *K. pneumoniae*, *P. aeruginosa*, *N. gonorrhoeae*, *S. aureus*, *C. difficile*, *E. faecalis*, and *V. vulnificus*, shown abbreviated with binomial initials. A case of within-ward sink-patient overlap is highlighted with red markers, corresponding to high strain containment in the metagenomes of sink A25 timepoints 1 and 4.

Constantinides et al.

310 coding resistance to important clinical antimicrobials. Populations of antimicrobial-  
311 resistant and susceptible *E. coli* and *Klebsiella* spp. may be persistent colonisers of  
312 sinks, and different wards may have markedly different sink ecosystems, perhaps  
313 reflecting different and potentially modifiable infrastructures, selection pressures, and  
314 contributing sources. Ward and sink-level genetic structure was most evident within  
315 the accessory genome, and observed repertoires of transmissible resistance genes  
316 often transcended species boundaries, instead clustering more tightly by sink unit.  
317 Characterising these highly diverse reservoirs is difficult, and we have shown that com-  
318 bination approaches utilising metagenomics and sequencing of cultured isolates are  
319 complementary in understanding the diversity of species, strains, and the resistance  
320 genes present within these niches. For example, metagenomics highlighted several  
321 cases of abundant *mcr-4* in sink drain aspirates from which cultured Enterobacterales  
322 isolates did not carry the gene.

323 Colonisation patterns of sink niches differed markedly between the two genera  
324 investigated. *E. coli* strains have evolved to colonize and adapt to multiple niches,  
325 including some which have adopted pathogenic lifestyles, and appear to have different  
326 distributions in humans, domesticated and wild animals, and the environment. There  
327 is however no absolute correlation between phylogenetic lineage and any given niche,  
328 and overlaps are observed. Interestingly, in our study, more than half of the *E. coli* sink  
329 isolates cultured were ST635, which has been recently described as a highly adapted,  
330 resistance- and virulence gene-enriched wastewater-associated strain thought to be  
331 globally distributed, but is also found in humans, animals and other environments  
332 (16). Of note, it has been observed in association with several clinically relevant trans-  
333 missible resistance genes, including ESBLs, carbapenemases, and rRNA methylases,  
334 and was one of only two *E. coli* STs in our study that harboured an ESBL (*bla*<sub>CTX-M-15</sub>).  
335 We observed presence/absence of *bla*<sub>CTX-M-15</sub> across closely related ST635 isolates,  
336 suggesting that this gene may be frequently lost/gained in sinks. Also notable in the  
337 context of ST635 was the ability of read-based *k*-mer composition to resolve fine-  
338 grained structure between the populations of different sinks, beyond that observed  
339 in the core-only SNP phylogeny. Other common *E. coli* sink lineages were ST399 and  
340 ST472, which to date have predominantly been seen in humans/animals, rather than  
341 the environment.

342 The phylogenetic distribution of sink isolates of *K. pneumoniae* appeared to mirror  
343 that seen in a global collection of isolates, providing little evidence that a particular  
344 lineage was predominating in, or particularly adapted to, the wastewater environment.  
345 Studies of the population structure of unselected *K. oxytoca* are limited, but again we  
346 observed a diverse population amongst sink isolates, with a deep branch separating  
347 two distinct groups as previously described. Interestingly, two *K. oxytoca* strains associ-  
348 ated with *bla*<sub>CTX-M-15</sub> were widely distributed amongst sinks in the acute admissions  
349 ward; outbreaks of ESBL- and carbapenem-associated *K. oxytoca* in association with  
350 contaminated handwashing sinks have been described in other settings (17).

351 Genomic overlap with sink isolates was identified in 1/46 (2%; 95% CI: 0.05-11%)  
352 of all sequenced isolates causing clinical infections over the same timeframe, with a  
353 temporal association consistent with acquisition from a sink source (i.e. sink isolate  
354 observed first), and following ten days of patient exposure to a ward environment  
355 wherein the overlapping strain was previously cultured. We may have significantly  
356 underestimated the degree of overlap between these two compartments for several  
357 reasons. Firstly, we have shown the diversity in sink niches is substantial, and with a  
358 culture-based approach agnostic to any selective marker, even sequencing 444 isolates  
359 from 48 sinks will have limited ability to capture the underlying diversity for complete

Multi-omic surveillance of *Escherichia coli* and *Klebsiella* spp. in hospital sink drains and patients

360 comparison of sink-patient pairs at the isolate-level. Supporting this, screening the  
361 metagenomes of a subset of 20 sinks using patient isolates suggests that overlap  
362 between these reservoirs may be more common than observed at the isolate-level.  
363 Second, clinical isolates represent the tip of the iceberg of any transmission chain,  
364 with the majority of transmission events likely occurring between gastrointestinal tract  
365 (asymptomatic carriage) and the wastewater environment. Nonetheless, in the context  
366 of understanding how sinks may be contributing to infection caused by *Klebsiella* spp.  
367 and *E. coli*, focusing on clinical isolates seems appropriate. Third, the interval between  
368 sampling dates for our observed patient-sink isolate-pair was 58 days, suggesting that  
369 the timeframe between environmental acquisition from the environment and infection may be long,  
370 and may not be adequately captured with a study timeframe spanning three months.

371 In addition, a major study limitation is the fact that only 46/107 patient isolates  
372 could be successfully retrieved (due to the high turnover of samples in our high-volume  
373 service laboratory), and *Klebsiella* spp. cultures were especially limited. The risks of  
374 transmission and possibly sink-associated infection could be more clearly defined by  
375 more extensive sampling over a greater timeframe, and thorough investigation into  
376 the exchange of resistance-associated mobile genetic elements, but would require  
377 a considerable increment in resource. Characterising microbial diversity present on  
378 sink strainers would also be of benefit, as the risks of droplet-mediated dispersal from  
379 sink drains have been shown to be most significant when the sink drain is located  
380 immediately below the tap, and if the organisms migrate from the sink trap onto the  
381 strainer (18, 19). However, given the different sink structures across wards, the p-trap  
382 was the only site which could be consistently sampled (since ACC had horizontally  
383 draining sinks without strainers). Characterising factors that might be associated with  
384 greater predominance of Enterobacterales and drug-resistant Enterobacterales, such  
385 as sink usage, ward-level antimicrobial usage, and patient populations, would also be  
386 of interest.

387 In conclusion, without conditioning on the presence of resistance markers, we  
388 have demonstrated that colonisation of ward sink drains with diverse and abundant  
389 populations of Enterobacterales, including drug-resistant strains, is common and  
390 persistent. The evidence linking contaminated, unmitigated wastewater reservoirs  
391 (including sink drains) in healthcare settings with outbreaks of colonisation/disease  
392 with drug-resistant Gram-negative bacilli in patients seems clear (5, 20), but no study  
393 to our knowledge has focused on the potential risk posed by Enterobacterales in sinks  
394 in general. Screening of sinks is not carried out in the absence of observed outbreaks,  
395 making it difficult to quantify wider patient-associated risk from the studies available.  
396 We demonstrate that contaminated sinks may be contributing to a proportion of  
397 healthcare-associated infections caused by Enterobacterales, and further work to  
398 investigate how to reduce the risk posed by this hospital environmental reservoir is  
399 warranted.

## 400 MATERIALS AND METHODS

401 **Ward-based sink sampling.** We sampled three units (acute admissions [AA], adult  
402 critical care [ACC], adult general medicine [female only] [GM]) within a single hospital  
403 (John Radcliffe Hospital, Oxford, UK) four times on rotation every three weeks over  
404 three months, March-May 2017. Units were chosen to capture different patient pop-  
405 ulations, admission turnaround times and wastewater plumbing infrastructure. The  
406 haematology ward (on a separate hospital site) was also sampled on a single day (12th  
407 May 2017) subsequent to a small cluster of patient cases of bla<sub>OXA-48</sub> carbapenemase-  
408 associated Enterobacterales bloodstream infections [described previously (21)]. Ward

Constantinides et al.

409 and sink/wastewater layouts were obtained from estates, and each sink/drain site was  
410 assigned a unique site identifier (Table S1).

411 On each day of sampling, autoclaved tubing cut to 10 inches was used to aspi-  
412 rate from sink p-traps via a sterile 50ml syringe. Up to 50mls of fluid was aspirated  
413 where possible. 100µL of 10-fold dilutions ( $10^{-2}$ ,  $10^{-3}$ ,  $10^{-4}$ ) of each sink p-trap aspirate  
414 were plated onto CHROMagar Orientation media (Becton Dickinson, Franklin Lakes, NJ,  
415 USA), with no disc, cefpodoxime (10µg), ertapenem (10µg) (Thermo Scientific Oxoid,  
416 Basingstoke, UK) applied in a triangular fashion to each plate. Cultures were incu-  
417 bated at 37°C for ~18hrs. Growth of Enterobacterales (presence/absence) and density  
418 (sparse/dense/confluent) in all zones was recorded (i.e. no antibiotic, in the presence of  
419 cefpodoxime, and in the presence of ertapenem). Up to four distinct colonies of each  
420 of presumptive *E. coli* and *Klebsiella* spp. were sub-cultured on CHROMagar Orientation  
421 to confirm purity and species identification. Species identification of sub-cultured  
422 colonies was confirmed by MALDI-ToF (MALDI Biotyper, Bruker, Billerica, MA, USA).  
423 Stocks of sub-cultured isolates were stored at -80°C in 400µl of nutrient broth + 10%  
424 glycerol prior to DNA extraction for sequencing. Aspirates from sink p-traps were then  
425 centrifuged at 4000 rpm for 10 minutes at 4°C, and supernatants removed; pellets  
426 were stored at -80°C.

427 **Patient isolate sampling.** For AA, ACC, GM wards, a pseudo-anonymised, prospec-  
428 tive feed was set-up to try and enable real-time capture of isolates from all samples  
429 culture-positive for *E. coli*, *K. pneumoniae* and *K. oxytoca* from patients that had been  
430 admitted to any of these wards during the study time period and were processed  
431 routinely through the clinical microbiology laboratory in the John Radcliffe Hospital in  
432 accordance with local standard operating procedures for clinical sample types, and  
433 compliant with national standards for microbiology investigations (22). These typi-  
434 cally involve selective culture steps and species identification using MALDI-ToF (MALDI  
435 BioTyper, Bruker, Billerica, MA, USA).

436 Pseudo-anonymised extracts of all patient culture results and admission/discharge  
437 data covering the study period were obtained after the study was finished through  
438 the Infections in Oxfordshire Database (which has generic Research Ethics Committee,  
439 Health Research Authority and Confidentiality Advisory Group approvals [14/SC/1069,  
440 ECC5-017(A)/2009]) to enable an evaluation of *i*) baseline sampling denominators,  
441 *ii*) the extent of relevant clinical isolate capture, and *iii*) the temporal and spatial  
442 overlap of any genetically related sequenced isolates from patients and sequenced  
443 isolates/metagenomes from sinks.

444 **Isolate sequencing and p-trap aspirate metagenomics.** All isolates confirmed  
445 as *E. coli*, *K. pneumoniae* and *K. oxytoca* from patients and p-trap aspirates were ex-  
446 tracted for sequencing using the QuickGene DNA extraction kit (Autogen, MA, USA) as  
447 per the manufacturer's instruction, plus an additional mechanical lysis step prior to  
448 chemical lysis (FastPrep, MP Biomedicals, CA, USA; 6m/s for two 40 second cycles).

449 For metagenomics, DNA was extracted from a subset of stored pellets (n=20)  
450 using the MoBio PowerSoil DNA isolation kit (Qiagen, Hilden, Germany) as per the  
451 manufacturer's instructions, and including a mechanical lysis step of two 40 second  
452 cycles at 6m/s in lysing matrix E and final elution in buffer CDT-1 (Autogen, MA, USA).  
453 45ng of *Thermus thermophilus* DNA (reference strain HB27, ATCC BAA-163 [DSMZ,  
454 Germany]) was added to each sample in the PowerBead tube at the start of the  
455 experiment, prior to the addition of solution C1 as an internal control and normalisation  
456 marker (12). Sink aspirates were selected for metagenomics sequencing to enable  
457 evaluation of *i*) microbiome differences within and between wards, *ii*) longitudinal  
458 change in microbiota composition, and *iii*) whether culture-negative sinks harboured

Multi-omic surveillance of *Escherichia coli* and *Klebsiella* spp. in hospital sink drains and patients

459 the bacterial species being studied i.e. indicating limited sensitivity of culture-based  
460 approaches.

461 Short read sequencing (single isolate and metagenomics) was performed on the  
462 Illumina HiSeq 4000, pooling 192 isolate extracts and 6 metagenomes per lane, and  
463 generating 150bp paired-end reads.

464 **Computational methods.** Cultured isolate informatics. Of the isolates sent for  
465 sequencing, 439/446 (98%) sink and 46/46 (100%) patient isolates were successfully  
466 sequenced and classified with Kraken/MiniKraken (23) as Enterobacterales, and used  
467 for subsequent analysis. Isolate consensus sequences were constructed by read  
468 mapping and consensus inference with respective *E. coli*, *K. oxytoca* and *K. pneumoniae*  
469 reference genomes AE014075.1, NC\_018106.1 and CP000647.1 using Snippy 4.4.0 (24).  
470 Isolate genomes were assembled using Shovill 1.0.4 (25). Recombination-adjusted  
471 phylogenetic reconstruction was performed using runListCompare 0.3.8 (26) wrapping  
472 IQ-TREE 1.6.11 (27) and ClonalFrameML 1.12 (28). Final core genome alignments  
473 included 218/219 *E. coli* isolates, 165/167 *K. oxytoca* isolates and 98/99 *K. pneumoniae*  
474 isolates, all of which satisfied the runListCompare filtering criteria of perACGT\_cutoff  
475  $\geq 70\%$ , varsite\_keep  $\geq 0.8$  and seq\_keep  $\geq 0.7$ . 100 SNP core genome clusters were  
476 defined by single linkage clustering of runListCompare pairwise distance matrices.  
477 Trees were midpoint rooted prior to visualisation. See supplementary data repository  
478 for runListCompare configuration. Read-based MASH trees were constructed using  
479 MASH 2.2.2 (29) and RapidNJ 2.3.2 (30) using 21mers, a sketch size of 10,000 and a  
480 minimum abundance threshold of 10 *k*-mers. Assembly-based core and accessory  
481 genome partitioning was performed using PopPUNK 1.1.7 (31). Resistance genotyping  
482 and phenotype prediction in cultured isolates was performed using ResPipe and ARIBA  
483 2.14.4 (32) with the CARD 3.0.3 database (33). Tree comparisons (tanglegrams) were  
484 generated using the R package Dendextend 1.5.0 (34).

485 **Metagenome informatics.** Metagenomic sequences were analysed for taxonomic  
486 and antimicrobial resistance gene presence using ResPipe (12) and Kraken2 (35) with  
487 CARD database version 3.0.3. Large resistance gene families were clustered to facilitate  
488 visualisation of resistance profiles (Figure 4) (methodology documented in supplement-  
489 ary data repository). A metagenomic assembly of the *mcr-4* gene was generated with  
490 MEGAHIT 1.2.9 (36), to which reads were aligned with Minimap2 2.17-r941 (37) and  
491 consensus inferred using Kindel (38). Metagenomic summary statistics were generated  
492 using Pavian (39). Data analysis was performed with the SciPy ecosystem (40) and  
493 JupyterLab (41). Matplotlib (42), Bokeh and Microreact (43) were used for visualisation.

494 **Data availability.** Raw sequencing data are available under NCBI SRA accessions  
495 PRJNA604910 and PRJNA604975 (cultured isolates), and ENA project PRJEB36775  
496 (metagenomes). A supplementary data repository containing metadata, phylogene-  
497 nies, Jupyter notebooks, Microreact projects and Pavian reports is archived at [https://  
498 figshare.com/articles/Enterobacterales\\_colonisation\\_of\\_hospital\\_sink\\_drains/11860893](https://figshare.com/articles/Enterobacterales_colonisation_of_hospital_sink_drains/11860893)

## 499 ACKNOWLEDGMENTS

500 This work was funded by the National Institute for Health Research Health Protection  
501 Research Unit (NIHR HPRU) in Healthcare Associated Infections and Antimicrobial Re-  
502 sistance at the University of Oxford, in partnership with Public Health England (PHE)  
503 [HPRU-2012-10041] and the NIHR Oxford Biomedical Research Centre. This work was  
504 supported by an Oxford University Clinical Academic Graduate School (OUCAGS) Ca-  
505 reer Development Support for Clinical Lecturers grant to NS. Extensive use was made  
506 of The Oxford Biomedical Research Computing (BMRC) facility, a joint development  
507 between the Wellcome Centre for Human Genetics and the Big Data Institute sup-

Constantinides et al.

508 ported by Health Data Research UK and the NIHR Oxford Biomedical Research Centre.  
509 Financial support was also provided by the Wellcome Trust Core Award Grant Number  
510 203141/Z/16/Z. NS is funded by a University of Oxford/Public Health England lecture-  
511 ship. TEAP and ASW are NIHR Senior Investigators. The views expressed are those of  
512 the author(s) and not necessarily those of the NHS, the NIHR or the Department of  
513 Health.

514 We thank the staff of the microbiology laboratory at OUH NHS Foundation Trust,  
515 the healthcare staff on the participating units, and Neil Hemmings and the Estates team  
516 at OUH for their cooperation in sample collection. Valuable discussion with Timothy  
517 Davies, Liam Shaw and Jeremy Swann informed computational analysis.

## 518 SUPPLEMENTARY MATERIAL

519 **Table S1.** Surveyed sink descriptions and *E. coli/Klebsiella* spp. culture results across  
520 timepoints.

521 **Table S2.** Cultured Enterobacterales species by ward.

522 **Table S3.** Pairwise Mantel correlation of different within-species distance matrices.  
523 These include recombination-adjusted core SNP phylogeny (reads-core-snp), read-  
524 based MASH distance (reads-mash) and PopPUNK estimates of core and accessory ge-  
525 nomic distance from de novo assemblies (assemblies-core-mash, assemblies-accessory-  
526 mash).

527 **Table S4.** Permutational analysis of variance. Permutation tests for association of  
528 genetic structure with ward (n=3) and sink (n=18) for three species of sink drain Enter-  
529 obacterales. Corresponding test results are shown for differential dispersion between  
530 groups (PERMDISP). Bold type indicates significant (p<0.05) group association under  
531 PERMANOVA in the absence of significant differential dispersion (PERMDISP).

532 **Table S5.** *mcr-4* coverage. Sequencing coverage and mean depth of the 1,626bp  
533 metagenome-assembled *mcr-4* gene from sink A10, to which metagenomic short reads  
534 mapped from three sinks (including A10) across six sink-timepoints within the general  
535 medicine ward.

536 **Figure S1.** Cultured strains observed on the Haematology ward. Different colours  
537 indicate distinct 100 core SNP strains, and cefpodoxime-resistant and/or ESBL gene-  
538 positive isolates are indicated by filled markers.

539 **Figure S2.** Spatial structure of sink metagenome *k*-mer composition. Left and centre:  
540 visualisation of 31mer pairwise MASH distances of total metagenome content using  
541 hierarchical clustering (left) and multidimensional scaling (centre). Right: comparison  
542 of within sink, within ward and between ward pairwise MASH distances.

543 **Figure S3.** Receiver operating characteristic (ROC) for detection of Enterobacterales by  
544 culture with varying metagenomic abundance.

545 **Figure S4.** Tanglegrams comparing recombination-corrected core phylogenies and  
546 read-based whole genome MASH + neighbour joining phylogenies for a) *E. coli*, b) *K.*  
547 *oxytoca* and c) *K. pneumoniae*. Topologically consistent subtrees are rendered with solid  
548 branches.

549 **Figure S5.** *Klebsiella* spp. lineage persistence in cultured sink drain aspirates and  
550 contemporaneous clinical isolates from patients with ward contact during the sampling  
551 period.

552



553 REFERENCES

1. **PHE**. 2019. English Surveillance Programme for Antimicrobial Utilisation and Resistance (ESPAUR) Report 2018–2019. PHE.
2. **Tenaillon O, Skurnik D, Picard B, Denamur E**. 2010 Mar. The population genetics of commensal *Escherichia coli*. *Nat. Rev. Microbiol.* 8(3):207–217. <http://www.nature.com/articles/nrmicro2298>.
3. **The Global Sewage Surveillance project consortium, Hendriksen RS, Munk P, Njage P, van Bunnik B, McNally L, Lukjancenko O, Röder T, Nieuwenhuijse D, Pedersen SK, Kjeldgaard J, Kaas RS, Clausen PTL, Vogt JK, Leekitcharoenphon P, van de Schans MGM, Zuidema T, de Roda Husman AM, Rasmussen S, Petersen B, Amid C, Cochrane G, Sicheritz-Ponten T, Schmitt H, Alvarez JRM, Aidara-Kane A, Pamp SJ, Lund O, Hald T, Woolhouse M, Koopmans MP, Vigne H, Petersen TN, Aarestrup FM**. 2019 Dec. Global monitoring of antimicrobial resistance based on metagenomics analyses of urban sewage. *Nat. Commun.* 10(1):1124. <http://www.nature.com/articles/s41467-019-08853-3>.
4. **PHE**. 2017. Preventing healthcare associated Gram-negative bloodstream infections: an improvement resource. Public Health England.
5. **Kizny Gordon AE, Mathers AJ, Cheong EYL, Gottlieb T, Kotay S, Walker AS, Peto TEA, Crook DW, Stoesser N**. 2017 May. The Hospital Water Environment as a Reservoir for Carbapenem-Resistant Organisms Causing Hospital-Acquired Infections—A Systematic Review of the Literature. *Clin. Infect. Dis.* 64(10):1435–1444. <https://academic.oup.com/cid/article-lookup/doi/10.1093/cid/cix132>.
6. **Mathers AJ, Crook D, Vaughan A, Barry KE, Vegesana K, Stoesser N, Parikh HI, Sebra R, Kotay S, Walker AS, Sheppard AE**. 2019 Mar. *Klebsiella quasipneumoniae* Provides a Window into Carbapenemase Gene Transfer, Plasmid Rearrangements, and Patient Interactions with the Hospital Environment. *Antimicrob. Agents Chemother.* 63(6):e02513–18. <http://aac.asm.org/lookup/doi/10.1128/AAC.02513-18>.
7. **Hopman J, Tostmann A, Wertheim H, Bos M, Kolwijck E, Akkermans R, Sturm P, Voss A, Pickkers P, vd Hoeven H**. 2017 Dec. Reduced rate of intensive care unit acquired gram-negative bacilli after removal of sinks and introduction of 'water-free' patient care. *Antimicrob. Resist. & Infect. Control.* 6(1):59. <http://aricjournal.biomedcentral.com/articles/10.1186/s13756-017-0213-0>.
8. **Mathers AJ, Vegesana K, German Mesner I, Barry KE, Pannone A, Baumann J, Crook DW, Stoesser N, Kotay S, Carroll J, Sifri CD**. 2018 Jul. Intensive Care Unit Wastewater Interventions to Prevent Transmission of Multispecies *Klebsiella pneumoniae* Carbapenemase-Producing Organisms. *Clin. Infect. Dis.* 67(2):171–178. <https://academic.oup.com/cid/article/67/2/171/4834952>.
9. **Quainoo S, Coolen JPM, van Hijum SAFT, Huynen MA, Melchers WJG, van Schaik W, Wertheim HFL**. 2017 Oct. Whole-Genome Sequencing of Bacterial Pathogens: the Future of Nosocomial Outbreak Analysis. *Clin. Microbiol. Rev.* 30(4):1015–1063. <http://cmr.asm.org/lookup/doi/10.1128/CMR.00016-17>.
10. **Quince C, Walker AW, Simpson JT, Loman NJ, Segata N**. 2017 Sep. Shotgun metagenomics, from sampling to analysis. *Nat. Biotechnol.* 35(9):833–844. <http://www.nature.com/articles/nbt.3935>.
11. **Sukhum KV, Diorio-Toth L, Dantas G**. 2019 Sep. Genomic and Metagenomic Approaches for Predictive Surveillance of Emerging Pathogens and Antibiotic Resistance. *Clin. Pharmacol. & Ther.* 106(3):512–524. <https://onlinelibrary.wiley.com/doi/abs/10.1002/cpt.1535>.
12. **on behalf of the REHAB consortium, Gweon HS, Shaw LP, Swann J, De Maio N, AbuOun M, Niehus R, Hubbard ATM, Bowes MJ, Bailey MJ, Peto TEA, Hoosdally SJ, Walker AS, Sebra RP, Crook DW, Anjum MF, Read DS, Stoesser N**. 2019 Dec. The impact of sequencing depth on the inferred taxonomic composition and AMR gene content of metagenomic samples. *Environ. Microbiome* 14(1):7. <https://environmentalmicrobiome.biomedcentral.com/articles/10.1186/s40793-019-0347-1>.
13. **Johnson RC, Deming C, Conlan S, Zellmer CJ, Michelin AV, Lee-Lin S, Thomas PJ, Park M, Weingarten RA, Less J, Dekker JP, Frank KM, Musser KA, McQuiston JR, Henderson DK, Lau AF, Palmore TN, Segre JA**. 2018 Dec. Investigation of a Cluster of *Sphingomonas koreensis* Infections. *New Engl. J. Medicine* 379(26):2529–2539. <http://www.nejm.org/doi/10.1056/NEJMoa1803238>.
14. **Carattoli A, Villa L, Feudi C, Curcio L, Orsini S, Luppi A, Pezzotti G, Magistrali CF**. 2017 Aug. Novel plasmid-mediated colistin resistance *mcr-4* gene in *Salmonella* and *Escherichia coli*, Italy 2013, Spain and Belgium, 2015 to 2016. *Eurosurveillance* 22(31):30589. <http://www.eurosurveillance.org/ViewArticle.aspx?ArticleId=22851>.
15. **Bush SJ, Foster D, Eyre DW, Clark EL, De Maio N, Shaw LP, Stoesser N, Peto TEA, Crook DW, Walker AS**. 2019. Genomic diversity affects the accuracy of bacterial SNP calling pipelines. *bioRxiv* <https://www.biorxiv.org/content/early/2019/05/31/653774>.
16. **Zhi S, Banting G, Stothard P, Ashbolt NJ, Checkley S, Meyer K, Otto S, Neumann NF**. 2019 Jun. Evidence for the evolution, clonal expansion and global dissemination of water treatment-resistant naturalized strains of *Escherichia coli* in wastewater. *Water Res.* 156:208–222. <https://linkinghub.elsevier.com/retrieve/pii/S004313541930243X>.
17. **Lowe C, Willey B, O'Shaughnessy A, Lee W, Lum M, Pike K, Larocque C, Dedier H, Dales L, Moore C, McGeer A, the Mount Sinai Hospital Infection Control Team**. 2012 Aug. Outbreak of Extended-Spectrum  $\beta$ -Lactamase-producing *Klebsiella oxytoca* Infections Associated with Contaminated Handwashing Sinks. *Emerg. Infect. Dis.* 18(8):1242–1247. [http://wwwnc.cdc.gov/eid/article/18/8/11-1268\\_article.htm](http://wwwnc.cdc.gov/eid/article/18/8/11-1268_article.htm).
18. **Kotay SM, Donlan RM, Ganim C, Barry K, Christensen BE, Mathers AJ**. 2018 Oct. Droplet- Rather than Aerosol-Mediated Dispersion Is the Primary Mechanism of Bacterial Transmission from Contaminated Hand-Washing Sink Traps. *Appl. Environ. Microbiol.* 85(2):e01997–18. <http://aem.asm.org/lookup/doi/10.1128/AEM.01997-18>.
19. **Aranega-Bou P, George RP, Verlander NQ, Paton S, Bennett A, Moore G, Aiken Z, Akinremi O, Ali A, Cawthorne J, Cleary P, Crook DW, Decraene V, Dodgson A, Doumith M, Ellington M, Eyre DW, George RP, Grimshaw J, Guiver M, Hill R, Hopkins K, Jones R, Lenney C, Mathers AJ, McEwan A, Moore G, Neilson M, Neilson S, Peto TEA, Phan HTT, Regan M, Seale AC, Stoesser N, Turner-Gardner J, Watts V, Walker J, Sarah Walker A, Wyllie D, Welfare W, Woodford N**. 2019 May. Carbapenem-resistant Enterobacteriaceae dispersal from sinks is linked to drain position and drainage rates in a laboratory model system. *J. Hosp. Infect.* 102(1):63–69. <https://linkinghub.elsevier.com/retrieve/pii/S0195670118307114>.
20. **Carling PC**. 2018 Aug. Wastewater drains: epidemiology and interventions in 23 carbapenem-resistant organism outbreaks. *Infect. Control. & Hosp. Epidemiol.* 39(8):972–979. [https://www.cambridge.org/core/product/identifier/S0899823X18001381/type/journal\\_article](https://www.cambridge.org/core/product/identifier/S0899823X18001381/type/journal_article).
21. **Chau K**. WGS investigation of three OXA-48 carbapenemase bacteremias and sink colonisation on a haematology unit. Madrid, Spain 2018.
22. **PHE**. 2014. Standards for microbiology investigations (UK SMI). Public Health England.
23. **Wood DE, Salzberg SL**. 2014. Kraken: ultrafast metagenomic sequence classification using exact alignments. *Genome Biol.* 15(3):R46. <http://genomebiology.biomedcentral.com/articles/10.1186/>

Constantinides et al.

- [gb-2014-15-3-r46](https://doi.org/10.1101/2014-15-3-r46).
24. **Seemann T.**, Snippy 2019. <https://github.com/tseemann/snippy>, original-date: 2014-05-15T01:56:12Z.
  25. **Seemann T.**, Shovill 2019. <https://github.com/tseemann/shovill>, original-date: 2016-09-05T23:50:20Z.
  26. **Eyre D.**, runListCompare 2019. <https://github.com/davideyre/runListCompare>, original-date: 2017-12-15T08:49:46Z.
  27. **Nguyen LT, Schmidt HA, von Haeseler A, Minh BQ.** 2015 Jan. IQ-TREE: A Fast and Effective Stochastic Algorithm for Estimating Maximum-Likelihood Phylogenies. *Mol. Biol. Evol.* 32(1):268–274. <https://academic.oup.com/mbe/article-lookup/doi/10.1093/molbev/msu300>.
  28. **Didelot X, Wilson DJ.** 2015 Feb. ClonalFrameML: Efficient Inference of Recombination in Whole Bacterial Genomes. *PLOS Comput. Biol.* 11(2):e1004041. <https://journals.plos.org/ploscompbiol/article?id=10.1371/journal.pcbi.1004041>.
  29. **Ondov BD, Starrett GJ, Sappington A, Kostic A, Koren S, Buck CB, Phillippy AM.** 2019 Nov. Mash Screen: high-throughput sequence containment estimation for genome discovery. *Genome Biol.* 20(1):232. <https://doi.org/10.1186/s13059-019-1841-x>.
  30. **Simonsen M, Mailund T, Pedersen CNS.** 2008. Rapid Neighbour-Joining. In: Crandall KA, Lagergren J, editors. *Algorithms in Bioinformatics*, vol. 5251 Berlin, Heidelberg: Springer Berlin Heidelberg, p. 113–122. [http://link.springer.com/10.1007/978-3-540-87361-7\\_10](http://link.springer.com/10.1007/978-3-540-87361-7_10).
  31. **Lees JA, Harris SR, Tonkin-Hill G, Gladstone RA, Lo SW, Weiser JN, Corander J, Bentley SD, Croucher NJ.** 2019 Feb. Fast and flexible bacterial genomic epidemiology with PopPUNK. *Genome Res.* 29(2):304–316. <http://genome.cshlp.org/lookup/doi/10.1101/gr.241455.118>.
  32. **Hunt M, Mather AE, Sánchez-Busó L, Page AJ, Parkhill J, Keane JA, Harris SR.** 2017 Oct. ARIBA: rapid antimicrobial resistance genotyping directly from sequencing reads. *Microb. Genomics* 3(10). <https://www.microbiologyresearch.org/content/journal/mgen/10.1099/mgen.0.000131>.
  33. **Alcock BP, Raphenya AR, Lau TTY, Tsang KK, Bouchard M, Edalatmand A, Huynh W, Nguyen ALV, Cheng AA, Liu S, Min SY, Miroshnichenko A, Tran HK, Werfalli RE, Nasir JA, Oloni M, Speicher DJ, Florescu A, Singh B, Faltyn M, Hernandez-Koutoucheva A, Sharma AN, Bordeleau E, Pawlowski AC, Zubyk HL, Dooley D, Griffiths E, Maguire F, Winsor GL, Beiko RG, Brinkman FSL, Hsiao WWL, Domseelaar GV, McArthur AG.** 2019 Oct. CARD 2020: antibiotic resistome surveillance with the comprehensive antibiotic resistance database. *Nucleic Acids Res.* p. gkz935. <https://academic.oup.com/nar/advance-article/doi/10.1093/nar/gkz935/5608993>.
  34. **Galili T.** 2015 Nov. dendextend: an R package for visualizing, adjusting and comparing trees of hierarchical clustering. *Bioinformatics* 31(22):3718–3720. <https://academic.oup.com/bioinformatics/article-lookup/doi/10.1093/bioinformatics/btv428>.
  35. **Wood DE, Lu J, Langmead B.** 2019 Dec. Improved metagenomic analysis with Kraken 2. *Genome Biol.* 20(1):257. <https://genomebiology.biomedcentral.com/articles/10.1186/s13059-019-1891-0>.
  36. **Li D, Liu CM, Luo R, Sadakane K, Lam TW.** 2015 May. MEGAHIT: an ultra-fast single-node solution for large and complex metagenomics assembly via succinct de Bruijn graph. *Bioinformatics* 31(10):1674–1676. <https://academic.oup.com/bioinformatics/article-lookup/doi/10.1093/bioinformatics/btv033>.
  37. **Li H.** 2018 Sep. Minimap2: pairwise alignment for nucleotide sequences. *Bioinformatics* 34(18):3094–3100. <https://academic.oup.com/bioinformatics/article/34/18/3094/4994778>.
  38. **Constantinides B, Robertson D.** 2017 Jul. Kindel: indel-aware consensus for nucleotide sequence alignments. *The J. Open Source Softw.* 2(15):282. <http://joss.theoj.org/papers/10.21105/joss.00282>.
  39. **Breitwieser FP, Salzberg SL.** 2019 Sep. Pavian: interactive analysis of metagenomics data for microbiome studies and pathogen identification. *Bioinformatics* p. btz715. <https://academic.oup.com/bioinformatics/advance-article/doi/10.1093/bioinformatics/btz715/5573755>.
  40. **SciPy 1.0 Contributors, Virtanen P, Gommers R, Oliphant TE, Haberland M, Reddy T, Cournapeau D, Burovski E, Peterson P, Weckesser W, Bright J, van der Walt SJ, Brett M, Wilson J, Millman KJ, Mayorov N, Nelson ARJ, Jones E, Kern R, Larson E, Carey CJ, Polat Feng Y, Moore EW, VanderPlas J, Laxalde D, Perktold J, Cimrman R, Henriksen I, Quintero EA, Harris CR, Archibald AM, Ribeiro AH, Pedregosa F, van Mulbregt P.** 2020 Feb. SciPy 1.0: fundamental algorithms for scientific computing in Python. *Nat. Methods* <http://www.nature.com/articles/s41592-019-0686-2>.
  41. **Perez F, Granger BE.** 2007. IPython: A System for Interactive Scientific Computing. *Comput. Sci. & Eng.* 9(3):21–29. <http://ieeexplore.ieee.org/document/4160251/>.
  42. **Hunter JD.** 2007. Matplotlib: A 2D Graphics Environment. *Comput. Sci. & Eng.* 9(3):90–95. <http://ieeexplore.ieee.org/document/4160265/>.
  43. **Argimón S, Abudahab K, Goater RJE, Fedosejev A, Bhai J, Glasner C, Feil EJ, Holden MTG, Yeats CA, Grundmann H, Spratt BG, Aanensen DM.** 2016 Nov. Microreact: visualizing and sharing data for genomic epidemiology and phylogeography. *Microb. Genomics* 2(11). <https://www.microbiologyresearch.org/content/journal/mgen/10.1099/mgen.0.000093>.
